# Supplementary material
Source: HighWire-hosted journal article supplement (https://www.jrheum.org/highwire/filestream/40137/field_highwire_adjunct_files/0/201128DataSuppl.pdf)
Supplement: 201128DataSuppl.pdf [file 201128DataSuppl.pdf]

## ONLINE SUPPLEMENTARY MATERIAL

### Supplementary Table 1. Genes with RA-associated expression at the pre-pregnancy baseline among women who subsequently improve during pregnancy

Fold-changes (FCs) in expression and q values (to 1 decimal place) are shown for the 89 genes differentially expressed ( $FC \leq -2$  or  $FC \geq 2$ ,  $q < 0.05$ ) between RA<sub>improved</sub> vs healthy women at the pre-pregnancy (T0) baseline and at the 3<sup>rd</sup> trimester (T3). FCs corresponding to a decrease in expression are shown as negative values. The genes (n=24) that remained differentially expressed between RA<sub>improved</sub> vs healthy women at the 3<sup>rd</sup> trimester are shown in italics.

| Gene            | RA <sub>improved</sub> vs healthy at T0 |                | RA <sub>improved</sub> vs healthy at T3 |                |
|-----------------|-----------------------------------------|----------------|-----------------------------------------|----------------|
|                 | Fold-change                             | q value        | Fold-change                             | q value        |
| ANKRD34B        | 2.4                                     | 1.6E-03        | 1.5                                     | 1.8E-01        |
| ANXA3           | 2.0                                     | 2.1E-02        | 1.2                                     | 6.1E-01        |
| BLVRB           | 2.0                                     | 1.5E-04        | 1.5                                     | 7.7E-02        |
| BOLA2B          | 2.1                                     | 3.6E-02        | 1.0                                     | 9.4E-01        |
| <i>C4BPA</i>    | 2.5                                     | <i>1.2E-04</i> | 2.9                                     | <i>1.6E-06</i> |
| C8orf88         | 2.0                                     | 2.7E-03        | 1.6                                     | 8.2E-02        |
| CAMP            | 4.1                                     | 2.2E-04        | 1.7                                     | 3.3E-01        |
| CBS             | 2.1                                     | 2.8E-02        | -1.1                                    | 8.7E-01        |
| CD177           | 5.1                                     | 5.7E-04        | 2.2                                     | 1.7E-01        |
| <i>CENPK</i>    | 2.0                                     | <i>4.0E-04</i> | 2.7                                     | <i>3.2E-08</i> |
| CMPK2           | -2.8                                    | 4.9E-03        | 1.1                                     | 9.0E-01        |
| CRISP3          | 4.1                                     | 2.3E-04        | 1.7                                     | 3.1E-01        |
| DDX11L10        | -2.0                                    | 9.5E-03        | -1.4                                    | 3.1E-01        |
| <i>DDX11L9</i>  | <i>-2.1</i>                             | <i>2.2E-02</i> | -2.3                                    | <i>1.1E-02</i> |
| DDX60           | -2.0                                    | 2.2E-03        | 1.2                                     | 6.2E-01        |
| EPB42           | 2.2                                     | 4.9E-04        | 1.5                                     | 1.3E-01        |
| <i>EPHB2</i>    | <i>-2.1</i>                             | <i>4.6E-03</i> | -2.0                                    | <i>1.1E-02</i> |
| EPSTI1          | -2.1                                    | 4.6E-02        | 1.3                                     | 5.7E-01        |
| <i>FADS2</i>    | <i>-2.3</i>                             | <i>2.2E-07</i> | -2.3                                    | <i>2.1E-07</i> |
| FGFR2           | -2.2                                    | 4.9E-04        | -1.7                                    | 5.0E-02        |
| HERC5           | -2.9                                    | 3.4E-03        | -1.1                                    | 9.3E-01        |
| HIST1H4E        | 2.1                                     | 1.5E-04        | 1.3                                     | 3.2E-01        |
| <i>HLA-DQA2</i> | <i>3.1</i>                              | <i>1.4E-10</i> | 3.5                                     | <i>8.7E-14</i> |

|                 |      |                |      |                |
|-----------------|------|----------------|------|----------------|
| IFI44           | -2.9 | 6.2E-03        | 1.1  | 8.9E-01        |
| IFI44L          | -3.2 | 5.0E-03        | 1.0  | 9.8E-01        |
| <i>IFITM3</i>   | -2.5 | <i>1.3E-02</i> | -2.5 | <i>1.5E-02</i> |
| <i>IGHA1</i>    | -2.8 | <i>8.6E-03</i> | -2.6 | <i>1.9E-02</i> |
| IGHG1           | -3.8 | 1.8E-02        | -1.9 | 4.1E-01        |
| IGHV3-23        | -2.1 | 9.8E-03        | -1.3 | 5.9E-01        |
| IGHV3-7         | -2.1 | 8.3E-05        | -1.3 | 4.8E-01        |
| IGHV5-51        | -2.1 | 2.5E-03        | -1.9 | 2.8E-02        |
| IGLC2           | -2.1 | 3.0E-02        | -1.6 | 2.6E-01        |
| <i>IGLC3</i>    | -2.8 | <i>5.3E-03</i> | -2.8 | <i>7.0E-03</i> |
| IGLV2-14        | -2.0 | 1.2E-02        | -1.5 | 2.6E-01        |
| <i>IGLV3-21</i> | -3.3 | <i>8.9E-03</i> | -3.6 | <i>7.0E-03</i> |
| IL1RL1          | -2.2 | 5.3E-05        | -1.6 | 8.2E-02        |
| <i>IL5RA</i>    | -2.4 | <i>1.7E-02</i> | -2.5 | <i>1.0E-02</i> |
| <i>ITGA2B</i>   | -2.0 | <i>1.1E-02</i> | -2.2 | <i>4.0E-03</i> |
| ITGB3           | -2.0 | 6.6E-03        | -1.5 | 2.5E-01        |
| ITLN1           | 2.0  | 1.3E-03        | 1.5  | 4.8E-02        |
| KLF1            | 2.1  | 1.1E-02        | 1.8  | 4.8E-02        |
| KRT1            | 2.4  | 1.8E-04        | 1.7  | 4.3E-02        |
| LGALS2          | 2.1  | 1.6E-02        | 1.3  | 5.4E-01        |
| <i>LRRC7</i>    | 2.0  | <i>2.5E-03</i> | 2.9  | <i>7.4E-08</i> |
| LY6E            | -2.1 | 1.9E-02        | -1.5 | 3.9E-01        |
| <i>MAOA</i>     | 3.1  | <i>9.2E-06</i> | 3.1  | <i>3.2E-08</i> |
| MMP8            | 3.1  | 1.3E-02        | 1.6  | 4.2E-01        |
| MT-ND6          | -2.3 | 1.4E-02        | -1.2 | 7.5E-01        |
| MX1             | -2.6 | 1.6E-02        | -1.2 | 8.3E-01        |
| MYL6            | 2.0  | 4.9E-04        | 1.4  | 2.5E-01        |
| <i>NEBL</i>     | -2.0 | <i>5.2E-05</i> | -2.1 | <i>1.4E-05</i> |
| NKX3-1          | -2.0 | 1.1E-02        | -1.9 | 3.6E-02        |
| OAS1            | -2.2 | 3.1E-02        | -1.0 | 9.6E-01        |
| OAS2            | -2.3 | 1.3E-03        | 1.1  | 8.9E-01        |
| OAS3            | -3.4 | 1.8E-03        | -1.2 | 8.4E-01        |
| OLFM4           | 5.3  | 9.0E-05        | 2.6  | 5.1E-02        |
| <i>OLIG2</i>    | -3.8 | <i>8.4E-05</i> | -5.1 | <i>1.0E-06</i> |
| ORM1            | 3.0  | 3.9E-03        | 1.2  | 7.7E-01        |
| <i>PAQR9</i>    | 2.2  | <i>2.7E-02</i> | 2.3  | <i>1.1E-02</i> |
| PCSK5           | -3.1 | 2.5E-06        | -1.5 | 2.9E-01        |
| PDZK1IP1        | 2.0  | 3.0E-03        | 1.6  | 1.0E-01        |
| <i>PF4V1</i>    | -2.4 | <i>7.4E-07</i> | -2.2 | <i>1.4E-05</i> |
| PLEK2           | 2.0  | 3.3E-05        | 1.6  | 1.1E-02        |
| PPFIA4          | 2.2  | 9.6E-05        | 1.2  | 5.3E-01        |
| PRDX5           | 2.0  | 1.4E-04        | 1.3  | 4.0E-01        |
| <i>PTGDR2</i>   | -2.5 | <i>3.6E-02</i> | -2.5 | <i>3.2E-02</i> |

|                |      |         |      |         |
|----------------|------|---------|------|---------|
| PTMS           | 2.2  | 3.2E-02 | 1.1  | 8.3E-01 |
| <i>RGPD2</i>   | 2.2  | 1.3E-08 | 2.5  | 4.8E-13 |
| RGS1           | -2.3 | 4.8E-03 | -1.2 | 6.5E-01 |
| RPL11          | 2.0  | 2.7E-03 | 1.3  | 3.8E-01 |
| RPL36AL        | 2.0  | 4.3E-02 | 1.6  | 2.1E-01 |
| RPS3           | 2.0  | 6.3E-03 | 1.2  | 5.8E-01 |
| RPS6           | 2.0  | 2.5E-03 | 1.5  | 1.9E-01 |
| RSAD2          | -3.2 | 2.2E-02 | 1.4  | 6.8E-01 |
| S100A12        | 2.0  | 4.6E-02 | 1.1  | 9.1E-01 |
| SELENBP1       | 2.0  | 5.0E-04 | 1.2  | 6.2E-01 |
| <i>SEPTIN3</i> | 2.4  | 2.1E-05 | 2.5  | 4.3E-05 |
| SIGLEC1        | -3.8 | 7.5E-04 | -1.4 | 6.1E-01 |
| SNRPD2         | 2.1  | 9.2E-03 | 1.5  | 2.6E-01 |
| TMC5           | 2.0  | 1.3E-04 | 1.3  | 2.5E-01 |
| TRBV12-4       | 2.2  | 1.4E-02 | 1.9  | 5.8E-02 |
| <i>TREML4</i>  | -2.3 | 9.5E-03 | -3.5 | 3.3E-07 |
| TRIM10         | 2.2  | 2.4E-06 | 1.7  | 5.2E-03 |
| TRPC6          | -2.5 | 2.5E-04 | -1.9 | 3.3E-02 |
| <i>TUBB2A</i>  | 2.0  | 2.2E-02 | 2.4  | 2.6E-03 |
| TXNDC5         | -2.1 | 1.7E-03 | -1.2 | 6.6E-01 |
| UBB            | 3.5  | 4.4E-06 | 1.7  | 1.7E-01 |
| USP18          | -2.4 | 4.8E-02 | 1.1  | 9.1E-01 |
| <i>VWF</i>     | -2.0 | 1.7E-02 | -2.5 | 5.0E-04 |

**Supplementary Table 2. Genes with RA-associated expression at the pre-pregnancy baseline among women who subsequently improve or worsen during pregnancy**

Fold-changes (FCs) in expression and q values (to 1 decimal place) are shown for the genes differentially expressed ( $FC \leq -2$  or  $FC \geq 2$ ,  $q < 0.05$ ) at the pre-pregnancy (T0) baseline between RA<sub>improved</sub> and healthy women and between RA<sub>worsened</sub> and healthy women. FCs corresponding to a decrease in expression are shown as negative values. Genes that overlap between the two RA expression signatures (n=19) are shown in bold. Remaining genes present in the RA<sub>improved</sub> signature are in black font and those in the RA<sub>worsened</sub> signature are in blue font.

| Gene            | RA <sub>improved</sub> vs healthy at T0 |         | RA <sub>worsened</sub> vs healthy at T0 |         |
|-----------------|-----------------------------------------|---------|-----------------------------------------|---------|
|                 | Fold-change                             | q value | Fold-change                             | q value |
| <b>ANKRD34B</b> | 2.4                                     | 1.6E-03 | -2.9                                    | 2.7E-03 |
| <b>FADS2</b>    | -2.3                                    | 2.2E-07 | -3.3                                    | 1.2E-07 |
| <b>HLA-DQA2</b> | 3.1                                     | 1.4E-10 | -3.4                                    | 1.1E-06 |
| <b>IGLC3</b>    | -2.8                                    | 5.3E-03 | -4.9                                    | 3.6E-07 |
| <b>IGLV2-14</b> | -2.0                                    | 1.2E-02 | -2.2                                    | 1.1E-03 |
| <b>IL1RL1</b>   | -2.2                                    | 5.3E-05 | -2.0                                    | 6.5E-03 |
| <b>KRT1</b>     | 2.4                                     | 1.8E-04 | 3.1                                     | 5.5E-03 |
| <b>NKX3-1</b>   | -2.0                                    | 1.1E-02 | -3.3                                    | 6.4E-06 |
| <b>OLFM4</b>    | 5.3                                     | 9.0E-05 | 2.7                                     | 8.7E-03 |
| <b>ORM1</b>     | 3.0                                     | 3.9E-03 | 2.6                                     | 1.9E-04 |
| <b>PF4V1</b>    | -2.4                                    | 7.4E-07 | -3.3                                    | 1.5E-04 |
| <b>PTMS</b>     | 2.2                                     | 3.2E-02 | 4.7                                     | 2.4E-09 |
| <b>RGPD2</b>    | 2.2                                     | 1.3E-08 | 3.7                                     | 9.8E-20 |
| <b>SEPTIN3</b>  | 2.4                                     | 2.1E-05 | 2.0                                     | 1.7E-02 |
| <b>TMC5</b>     | 2.0                                     | 1.3E-04 | 2.4                                     | 2.0E-03 |
| <b>TRBV12-4</b> | 2.2                                     | 1.4E-02 | 2.1                                     | 3.3E-02 |
| <b>TREML4</b>   | -2.3                                    | 9.5E-03 | 3.1                                     | 3.6E-06 |
| <b>TUBB2A</b>   | 2.0                                     | 2.2E-02 | 2.7                                     | 2.2E-02 |
| <b>UBB</b>      | 3.5                                     | 4.4E-06 | 2.9                                     | 1.4E-02 |
| ANXA3           | 2.0                                     | 2.1E-02 | 2.0                                     | 2.1E-01 |
| BLVRB           | 2.0                                     | 1.5E-04 | 1.3                                     | 6.6E-01 |
| BOLA2B          | 2.1                                     | 3.6E-02 | 1.8                                     | 5.1E-02 |
| C4BPA           | 2.5                                     | 1.2E-04 | 1.1                                     | 8.2E-01 |
| C8orf88         | 2.0                                     | 2.7E-03 | 1.5                                     | 2.9E-01 |
| CAMP            | 4.1                                     | 2.2E-04 | 1.3                                     | 6.5E-01 |
| CBS             | 2.1                                     | 2.8E-02 | 1.6                                     | 3.9E-01 |

|          |      |         |      |         |
|----------|------|---------|------|---------|
| CD177    | 5.1  | 5.7E-04 | 2.9  | 1.7E-01 |
| CENPK    | 2.0  | 4.0E-04 | 1.5  | 9.9E-02 |
| CMPK2    | -2.8 | 4.9E-03 | 1.3  | 8.0E-01 |
| CRISP3   | 4.1  | 2.3E-04 | 2.0  | 1.6E-01 |
| DDX11L10 | -2.0 | 9.5E-03 | -1.3 | 6.6E-01 |
| DDX11L9  | -2.1 | 2.2E-02 | 1.5  | 4.3E-01 |
| DDX60    | -2.0 | 2.2E-03 | 1.2  | 8.6E-01 |
| EPB42    | 2.2  | 4.9E-04 | 1.2  | 7.7E-01 |
| EPHB2    | -2.1 | 4.6E-03 | 1.3  | 6.8E-01 |
| EPSTI1   | -2.1 | 4.6E-02 | 1.5  | 6.2E-01 |
| FGFR2    | -2.2 | 4.9E-04 | -1.3 | 5.1E-01 |
| HERC5    | -2.9 | 3.4E-03 | 1.5  | 7.4E-01 |
| HIST1H4E | 2.1  | 1.5E-04 | 1.1  | 8.6E-01 |
| IFI44    | -2.9 | 6.2E-03 | 1.2  | 8.9E-01 |
| IFI44L   | -3.2 | 5.0E-03 | 1.2  | 8.7E-01 |
| IFITM3   | -2.5 | 1.3E-02 | 1.7  | 5.5E-01 |
| IGHA1    | -2.8 | 8.6E-03 | -1.3 | 7.4E-01 |
| IGHG1    | -3.8 | 1.8E-02 | -1.1 | 9.4E-01 |
| IGHV3-23 | -2.1 | 9.8E-03 | 1.1  | 8.5E-01 |
| IGHV3-7  | -2.1 | 8.3E-05 | 1.0  | 9.9E-01 |
| IGHV5-51 | -2.1 | 2.5E-03 | -1.3 | 6.1E-01 |
| IGLC2    | -2.1 | 3.0E-02 | -1.3 | 6.8E-01 |
| IGLV3-21 | -3.3 | 8.9E-03 | -2.9 | 1.2E-01 |
| IL5RA    | -2.4 | 1.7E-02 | -1.6 | 1.6E-01 |
| ITGA2B   | -2.0 | 1.1E-02 | -1.1 | 9.3E-01 |
| ITGB3    | -2.0 | 6.6E-03 | -2.4 | 7.8E-02 |
| ITLN1    | 2.0  | 1.3E-03 | 1.4  | 4.9E-01 |
| KLF1     | 2.1  | 1.1E-02 | 1.7  | 4.1E-01 |
| LGALS2   | 2.1  | 1.6E-02 | 1.5  | 3.8E-01 |
| LRRC7    | 2.0  | 2.5E-03 | 1.9  | 2.2E-02 |
| LY6E     | -2.1 | 1.9E-02 | 1.9  | 3.5E-01 |
| MAOA     | 3.1  | 9.2E-06 | 1.0  | 9.7E-01 |
| MMP8     | 3.1  | 1.3E-02 | 2.2  | 9.4E-02 |
| MT-ND6   | -2.3 | 1.4E-02 | 1.6  | 5.8E-01 |
| MX1      | -2.6 | 1.6E-02 | 1.4  | 7.8E-01 |
| MYL6     | 2.0  | 4.9E-04 | 1.7  | 5.6E-02 |
| NEBL     | -2.0 | 5.2E-05 | 1.1  | 7.1E-01 |
| OAS1     | -2.2 | 3.1E-02 | 1.4  | 7.4E-01 |
| OAS2     | -2.3 | 1.3E-03 | 1.1  | 9.1E-01 |
| OAS3     | -3.4 | 1.8E-03 | 1.2  | 9.3E-01 |
| OLIG2    | -3.8 | 8.4E-05 | -1.1 | 9.2E-01 |
| PAQR9    | 2.2  | 2.7E-02 | 1.5  | 4.7E-01 |
| PCSK5    | -3.1 | 2.5E-06 | 1.2  | 8.7E-01 |

|            |      |         |      |         |
|------------|------|---------|------|---------|
| PDZK1IP1   | 2.0  | 3.0E-03 | 1.7  | 3.0E-01 |
| PLEK2      | 2.0  | 3.3E-05 | 1.4  | 4.3E-01 |
| PPFIA4     | 2.2  | 9.6E-05 | 1.4  | 4.5E-01 |
| PRDX5      | 2.0  | 1.4E-04 | 1.9  | 6.8E-03 |
| PTGDR2     | -2.5 | 3.6E-02 | -2.0 | 1.1E-01 |
| RGS1       | -2.3 | 4.8E-03 | -1.3 | 5.1E-01 |
| RPL11      | 2.0  | 2.7E-03 | 1.4  | 4.7E-01 |
| RPL36AL    | 2.0  | 4.3E-02 | 1.3  | 6.1E-01 |
| RPS3       | 2.0  | 6.3E-03 | 1.6  | 2.7E-01 |
| RPS6       | 2.0  | 2.5E-03 | 1.6  | 3.4E-01 |
| RSAD2      | -3.2 | 2.2E-02 | 1.4  | 8.0E-01 |
| S100A12    | 2.0  | 4.6E-02 | 1.5  | 5.5E-01 |
| SELENBP1   | 2.0  | 5.0E-04 | 1.9  | 2.1E-01 |
| SIGLEC1    | -3.8 | 7.5E-04 | -1.3 | 8.6E-01 |
| SNRPD2     | 2.1  | 9.2E-03 | 1.7  | 2.5E-01 |
| TRIM10     | 2.2  | 2.4E-06 | 1.6  | 3.1E-01 |
| TRPC6      | -2.5 | 2.5E-04 | -1.9 | 6.3E-02 |
| TXNDC5     | -2.1 | 1.7E-03 | -1.3 | 5.5E-01 |
| USP18      | -2.4 | 4.8E-02 | 2.0  | 4.9E-01 |
| VWF        | -2.0 | 1.7E-02 | -1.1 | 9.4E-01 |
| A2M        | -1.3 | 8.5E-01 | 20.0 | 2.4E-36 |
| ABCD1      | -1.0 | 1.0E+00 | 2.2  | 1.5E-02 |
| ABCF2      | 1.4  | 4.2E-01 | 2.0  | 2.3E-02 |
| ABHD1      | 1.1  | 9.4E-01 | 2.3  | 4.9E-04 |
| ABHD12B    | -1.1 | 9.8E-01 | 2.1  | 3.8E-03 |
| ABI3       | -1.1 | 9.6E-01 | 2.6  | 4.6E-08 |
| ABI3BP     | -1.1 | 9.6E-01 | 2.2  | 3.6E-06 |
| AC001226.2 | -1.2 | 7.9E-01 | 5.3  | 1.3E-32 |
| AC005726.1 | -1.2 | 9.0E-01 | 2.2  | 2.7E-03 |
| AC015802.6 | 1.1  | 9.4E-01 | 2.2  | 2.4E-07 |
| AC018755.2 | 1.1  | 9.4E-01 | 3.4  | 6.6E-04 |
| AC069368.1 | 1.7  | 3.0E-01 | 2.9  | 1.4E-02 |
| AC072022.2 | 1.2  | 8.5E-01 | 8.2  | 1.1E-26 |
| AC091959.3 | 1.7  | 5.3E-02 | 2.1  | 1.6E-02 |
| AC104389.6 | 2.6  | 5.4E-02 | 8.1  | 4.6E-10 |
| AC107871.1 | 1.1  | 9.6E-01 | 2.1  | 4.4E-03 |
| ACO1       | -1.1 | 9.5E-01 | 6.0  | 1.1E-06 |
| ACOT13     | -1.0 | 9.9E-01 | 2.3  | 8.3E-09 |
| ADAMTS2    | 1.6  | 4.7E-01 | 3.2  | 2.7E-06 |
| ADAMTS5    | -1.3 | 6.6E-01 | -2.5 | 2.4E-02 |
| ADAMTSL4   | 1.0  | 9.9E-01 | 5.8  | 8.1E-09 |
| ADGRG2     | 1.0  | 9.9E-01 | 2.5  | 6.0E-05 |
| ADGRL1     | 1.1  | 9.6E-01 | 2.4  | 1.2E-04 |

|            |      |         |      |         |
|------------|------|---------|------|---------|
| AFDN       | -1.3 | 3.8E-01 | -2.1 | 2.5E-04 |
| AGBL5      | -1.1 | 9.5E-01 | 2.1  | 1.2E-05 |
| AK1        | 1.5  | 1.6E-01 | 2.7  | 1.8E-04 |
| AKAP5      | -1.0 | 1.0E+00 | 2.0  | 2.8E-03 |
| AKT2       | 1.3  | 4.2E-01 | -4.8 | 2.4E-08 |
| AL121594.1 | 1.2  | 8.6E-01 | -2.2 | 1.2E-02 |
| AL358113.1 | 1.0  | 1.0E+00 | 2.5  | 1.0E-05 |
| AL591806.4 | -1.1 | 9.6E-01 | 3.5  | 4.4E-05 |
| AL669918.1 | 1.4  | 8.0E-01 | 4.0  | 2.1E-08 |
| AL807752.6 | 1.8  | 5.1E-01 | 4.0  | 3.0E-03 |
| ALDH1A2    | 1.3  | 8.6E-01 | 3.1  | 2.9E-05 |
| ALG1L2     | -1.1 | 9.6E-01 | -2.0 | 4.1E-02 |
| ALOX12     | -1.1 | 9.1E-01 | 2.6  | 2.0E-06 |
| AMDHD1     | 1.1  | 9.4E-01 | 2.3  | 8.8E-04 |
| AMT        | 1.1  | 9.4E-01 | 2.1  | 1.9E-04 |
| ANKDD1A    | 1.5  | 1.4E-01 | 2.5  | 4.4E-05 |
| ANKUB1     | 1.0  | 9.9E-01 | 2.5  | 2.2E-05 |
| AP002990.1 | 1.3  | 7.9E-01 | 2.4  | 4.9E-03 |
| ARG1       | 1.8  | 2.4E-01 | 2.1  | 1.1E-02 |
| ARHGEF26   | -1.1 | 9.3E-01 | 2.1  | 1.6E-03 |
| ARHGEF35   | 1.4  | 2.0E-01 | 2.1  | 7.7E-04 |
| ARHGEF39   | 1.2  | 9.3E-01 | 2.0  | 4.8E-02 |
| ARHGEF4    | 1.0  | 9.9E-01 | 2.5  | 9.7E-04 |
| ARL2BP     | -1.1 | 9.6E-01 | -2.4 | 6.4E-06 |
| ARMC5      | 1.1  | 8.5E-01 | 2.7  | 8.1E-09 |
| ASAH2B     | 1.2  | 8.0E-01 | 2.9  | 2.0E-07 |
| ATP2C2     | 1.4  | 7.2E-01 | 2.3  | 7.9E-03 |
| ATP5PD     | 1.3  | 4.5E-01 | 2.9  | 2.8E-10 |
| ATP6V1F    | 1.1  | 9.4E-01 | 2.1  | 3.9E-04 |
| ATP8B1     | -1.3 | 8.8E-01 | 3.5  | 1.2E-08 |
| B3GALT2    | 1.1  | 9.6E-01 | 4.0  | 1.1E-16 |
| B3GNT7     | -1.1 | 9.7E-01 | 2.1  | 1.1E-03 |
| BAIAP3     | 1.3  | 6.6E-01 | 2.0  | 1.3E-02 |
| BBS5       | -1.1 | 9.5E-01 | 2.3  | 1.4E-03 |
| BIVM       | 1.3  | 3.6E-01 | 2.4  | 1.1E-03 |
| BTBD2      | -1.0 | 9.9E-01 | 2.1  | 2.4E-04 |
| BYSL       | -1.2 | 7.4E-01 | 2.0  | 3.2E-03 |
| C10orf105  | 1.1  | 9.5E-01 | 3.2  | 1.2E-04 |
| C1orf56    | 1.0  | 1.0E+00 | 3.9  | 2.5E-14 |
| C1orf74    | -1.1 | 8.6E-01 | 2.5  | 2.5E-06 |
| C3orf52    | -1.1 | 9.4E-01 | 2.2  | 2.7E-03 |
| C9orf131   | 1.0  | 1.0E+00 | 2.5  | 3.6E-05 |
| CA6        | 1.0  | 9.9E-01 | 2.5  | 3.9E-05 |





|              |      |         |      |         |
|--------------|------|---------|------|---------|
| CRELD2       | 1.3  | 8.1E-01 | 2.9  | 1.1E-03 |
| CRYBG2       | 1.1  | 9.2E-01 | 2.7  | 3.6E-06 |
| CTNNA2       | -1.0 | 9.9E-01 | -2.1 | 3.5E-02 |
| CTRL         | 1.5  | 3.8E-01 | 2.1  | 2.6E-02 |
| CXCL5        | -1.7 | 2.5E-03 | -2.2 | 1.5E-02 |
| CYBC1        | 1.2  | 6.2E-01 | 2.0  | 2.1E-02 |
| CYP27A1      | -1.5 | 1.5E-01 | -2.1 | 1.8E-04 |
| CYP46A1      | -1.2 | 7.2E-01 | 2.1  | 1.4E-05 |
| CYP4F8       | -1.3 | 7.7E-01 | 2.2  | 5.6E-03 |
| CYREN        | -1.0 | 1.0E+00 | 2.2  | 1.3E-03 |
| DAAM2        | 2.0  | 2.5E-01 | 4.4  | 4.1E-06 |
| DACT3        | 1.3  | 4.3E-01 | 2.1  | 6.3E-04 |
| DAXX         | -1.0 | 1.0E+00 | 2.8  | 2.5E-06 |
| DDTL         | 1.4  | 3.4E-01 | 2.1  | 3.1E-03 |
| DEDD         | -1.1 | 9.7E-01 | 2.0  | 5.9E-03 |
| DEFA3        | 2.7  | 2.7E-01 | 3.3  | 2.1E-02 |
| DERPC        | -1.4 | 7.3E-01 | -2.5 | 1.2E-03 |
| DIPK1B       | -1.3 | 7.1E-01 | 2.1  | 3.5E-03 |
| DNAH14       | 1.0  | 1.0E+00 | 2.6  | 2.9E-06 |
| DOK6         | 1.0  | 9.9E-01 | 4.1  | 9.4E-16 |
| DPCD         | 1.5  | 2.4E-01 | 2.0  | 3.1E-03 |
| DRAP1        | -1.1 | 9.5E-01 | 3.2  | 1.1E-03 |
| DSP          | 1.1  | 9.6E-01 | 2.9  | 3.7E-06 |
| ECSIT        | 1.2  | 7.3E-01 | 2.3  | 3.4E-07 |
| EFCAB10      | 1.0  | 1.0E+00 | 2.0  | 1.5E-02 |
| EFCAB6       | -1.2 | 7.5E-01 | 2.0  | 8.7E-04 |
| ELMO3        | 1.4  | 3.6E-01 | 2.3  | 4.5E-04 |
| ELOF1        | 1.5  | 1.1E-02 | 2.2  | 1.0E-04 |
| ENC1         | 1.1  | 9.4E-01 | -2.0 | 6.7E-04 |
| ENG          | -1.1 | 9.6E-01 | 2.0  | 4.6E-03 |
| EPHB4        | 1.5  | 4.8E-02 | 2.4  | 6.4E-06 |
| ERCC6L       | -1.2 | 7.6E-01 | 2.1  | 3.2E-03 |
| ERP29        | 1.4  | 2.4E-01 | 2.7  | 7.1E-08 |
| ESR1         | -1.3 | 4.5E-01 | 2.4  | 1.7E-06 |
| ESR2         | -1.0 | 9.9E-01 | 3.0  | 7.5E-06 |
| ETFBKMT      | -1.1 | 9.5E-01 | 2.0  | 2.8E-04 |
| EYS          | -1.0 | 9.8E-01 | 2.3  | 6.8E-06 |
| FABP5        | -1.2 | 8.7E-01 | 2.1  | 2.9E-03 |
| FAM181B      | -1.1 | 9.5E-01 | 2.9  | 3.5E-06 |
| FAM20A       | -1.1 | 9.4E-01 | 11.3 | 7.2E-50 |
| FAM47E-STBD1 | 1.1  | 9.7E-01 | 2.1  | 3.9E-02 |
| FAM83A       | 1.5  | 7.9E-01 | 8.6  | 4.8E-12 |

|          |      |         |      |         |
|----------|------|---------|------|---------|
| FAM86B1  | 1.1  | 9.7E-01 | 2.0  | 1.5E-02 |
| FARP1    | -1.0 | 1.0E+00 | 2.9  | 4.4E-10 |
| FAT4     | -1.5 | 1.0E-01 | -2.2 | 3.2E-04 |
| FBN2     | 1.0  | 9.9E-01 | -2.1 | 1.8E-04 |
| FBXL16   | 1.1  | 9.2E-01 | 2.0  | 1.4E-02 |
| FBXO10   | -1.1 | 9.8E-01 | 2.2  | 2.5E-03 |
| FBXO17   | -1.1 | 9.6E-01 | 2.2  | 1.4E-02 |
| FCER2    | 1.4  | 5.6E-01 | 3.5  | 4.2E-08 |
| FGF7     | 1.0  | 1.0E+00 | 2.4  | 6.1E-04 |
| FIZ1     | 1.0  | 1.0E+00 | 2.7  | 4.1E-06 |
| FLACC1   | 1.1  | 8.3E-01 | 2.2  | 2.5E-05 |
| FLOT2    | 1.3  | 6.7E-01 | 2.5  | 7.4E-03 |
| FRMD4A   | 1.1  | 9.8E-01 | 2.8  | 3.2E-08 |
| FSD2     | 1.1  | 9.5E-01 | 2.5  | 4.8E-06 |
| G0S2     | 1.8  | 7.5E-02 | 2.0  | 2.1E-02 |
| GADD45B  | 1.1  | 9.1E-01 | 2.3  | 3.5E-02 |
| GALM     | -1.2 | 6.7E-01 | 2.3  | 3.3E-02 |
| GHRL     | -1.1 | 9.7E-01 | 2.1  | 1.8E-03 |
| GLRX5    | 1.6  | 3.9E-02 | 2.1  | 1.6E-02 |
| GNAL     | 1.2  | 9.4E-01 | 3.8  | 3.0E-11 |
| GOLGA6L1 | 1.6  | 6.4E-01 | 4.0  | 1.4E-04 |
| GPM6B    | -1.1 | 9.4E-01 | 6.1  | 2.4E-24 |
| GPR18    | -1.1 | 9.0E-01 | 2.2  | 1.1E-06 |
| GPR68    | -1.0 | 9.9E-01 | 2.6  | 4.4E-06 |
| GPS2     | 1.3  | 2.7E-01 | 2.7  | 1.9E-09 |
| GPSM3    | 1.1  | 9.0E-01 | 2.8  | 5.8E-05 |
| HDGFL3   | -1.0 | 9.9E-01 | 2.2  | 9.5E-06 |
| HEPACAM  | 1.2  | 8.8E-01 | 2.6  | 2.5E-04 |
| HEXIM2   | -1.0 | 9.9E-01 | 4.3  | 3.0E-13 |
| HHLA1    | -1.5 | 3.9E-01 | 2.5  | 9.9E-03 |
| HLA-C    | 1.3  | 5.2E-01 | 3.5  | 2.5E-04 |
| HMGA1    | -1.3 | 4.5E-01 | 2.2  | 6.4E-06 |
| HRAS     | 1.3  | 6.2E-01 | 2.0  | 1.2E-02 |
| HSD17B1  | -1.0 | 9.9E-01 | 3.7  | 1.5E-15 |
| ICA1L    | -1.1 | 9.6E-01 | 2.0  | 6.1E-04 |
| IGHV4-39 | 1.5  | 3.9E-01 | 2.8  | 2.6E-03 |
| IL23R    | -1.4 | 4.1E-01 | -2.3 | 7.9E-03 |
| IL7      | 1.1  | 9.6E-01 | 2.2  | 2.6E-03 |
| INMT     | -1.1 | 9.6E-01 | 3.4  | 1.9E-05 |
| INSL6    | 1.0  | 9.9E-01 | 2.4  | 1.1E-06 |
| ISG20    | 1.0  | 9.9E-01 | 2.5  | 2.6E-02 |
| ISYNA1   | 1.1  | 9.6E-01 | 2.0  | 7.8E-03 |
| KCNE4    | -1.2 | 6.0E-01 | 2.0  | 1.8E-04 |

|           |      |         |      |         |
|-----------|------|---------|------|---------|
| KCNMA1    | 1.3  | 9.3E-01 | 2.9  | 1.2E-02 |
| KCNRG     | -1.4 | 6.3E-01 | 2.5  | 9.8E-04 |
| KIAA1211L | 1.6  | 4.4E-01 | 2.1  | 2.5E-02 |
| KIAA1324  | 1.2  | 6.5E-01 | -2.0 | 7.1E-03 |
| KIF19     | 1.4  | 6.7E-01 | 2.6  | 3.6E-06 |
| KIF24     | 1.1  | 9.4E-01 | 2.4  | 1.3E-06 |
| KY        | -1.0 | 9.9E-01 | 17.5 | 4.6E-28 |
| LCAT      | 1.4  | 5.6E-01 | 3.1  | 5.7E-06 |
| LCTL      | 1.0  | 9.9E-01 | 2.0  | 1.6E-02 |
| LGALS3BP  | -1.2 | 8.3E-01 | 2.0  | 1.6E-02 |
| LGR6      | 1.2  | 9.1E-01 | 2.3  | 5.5E-03 |
| LHPP      | 1.2  | 8.0E-01 | 2.2  | 1.9E-04 |
| LIMS2     | 1.4  | 7.0E-01 | 6.2  | 1.7E-15 |
| LINGO3    | 1.3  | 6.0E-01 | 12.9 | 3.5E-57 |
| LRP10     | 1.2  | 8.2E-01 | 2.4  | 9.3E-03 |
| LRRC34    | 1.0  | 9.9E-01 | 2.3  | 1.2E-04 |
| LRRC75A   | 1.4  | 1.4E-01 | 3.7  | 3.2E-12 |
| LRTOMT    | 1.0  | 9.9E-01 | 2.9  | 1.7E-09 |
| LSM2      | 1.1  | 9.7E-01 | 2.2  | 3.1E-02 |
| LSR       | 1.2  | 7.3E-01 | 2.4  | 3.7E-05 |
| LYSMD1    | 1.2  | 8.6E-01 | 4.5  | 1.5E-15 |
| LYVE1     | 1.3  | 7.0E-01 | 2.0  | 8.6E-04 |
| MAB21L3   | -1.1 | 9.4E-01 | 2.0  | 4.9E-04 |
| MAMDC4    | 1.0  | 9.9E-01 | 3.9  | 1.8E-07 |
| MAP7D1    | 1.4  | 4.4E-01 | 2.2  | 6.9E-03 |
| MAPK12    | -1.0 | 9.9E-01 | 3.0  | 1.4E-04 |
| MAPT      | -1.1 | 9.9E-01 | 2.5  | 1.4E-03 |
| MARCKSL1  | -1.1 | 9.7E-01 | 2.1  | 7.0E-04 |
| MAS1      | -1.2 | 8.4E-01 | 2.4  | 3.2E-04 |
| MCC       | 1.0  | 9.9E-01 | 3.5  | 1.1E-09 |
| MDGA1     | -1.2 | 8.4E-01 | -2.4 | 1.5E-03 |
| ME1       | -1.3 | 5.2E-01 | -2.1 | 1.6E-02 |
| MFSD2A    | -1.5 | 1.2E-01 | -2.0 | 6.9E-03 |
| MFSD4A    | -1.2 | 8.0E-01 | 2.1  | 1.0E-03 |
| MIEN1     | 1.3  | 5.6E-01 | 2.3  | 6.3E-05 |
| MLANA     | 1.0  | 1.0E+00 | 2.0  | 7.9E-05 |
| MLLT11    | -1.0 | 9.8E-01 | 5.7  | 1.0E-29 |
| MPV17L    | 1.1  | 9.7E-01 | 2.5  | 8.6E-09 |
| MS4A14    | -1.4 | 1.4E-01 | -2.9 | 3.1E-07 |
| MST1      | -1.1 | 9.5E-01 | 2.5  | 3.5E-05 |
| MTFR1     | -1.0 | 9.9E-01 | 3.0  | 7.3E-10 |
| MTRNR2L6  | -1.2 | 9.4E-01 | -4.6 | 3.3E-03 |
| MTRNR2L8  | -1.2 | 9.6E-01 | -3.7 | 3.9E-02 |

|          |      |         |       |         |
|----------|------|---------|-------|---------|
| MYH10    | 1.1  | 9.4E-01 | 11.6  | 6.5E-38 |
| MYH11    | -1.1 | 9.9E-01 | 3.4   | 5.8E-08 |
| MYH7B    | 1.0  | 1.0E+00 | 2.2   | 4.1E-03 |
| MYL4     | 1.6  | 6.1E-02 | 2.6   | 9.1E-04 |
| MYL5     | -1.0 | 1.0E+00 | 2.5   | 1.6E-06 |
| MYO16    | 1.2  | 8.9E-01 | 2.2   | 1.0E-02 |
| MYOM2    | -1.9 | 2.3E-02 | -2.3  | 3.1E-03 |
| NDUFB1   | 1.3  | 6.6E-01 | 3.1   | 7.4E-07 |
| NECTIN2  | 1.5  | 3.6E-01 | 2.2   | 3.3E-04 |
| NEXN     | -1.2 | 7.9E-01 | 2.3   | 4.1E-06 |
| NFE2L3   | -1.2 | 7.4E-01 | 3.4   | 2.6E-14 |
| NFIX     | 1.6  | 5.7E-02 | 3.0   | 1.3E-03 |
| NFKBIL1  | 1.2  | 8.5E-01 | 2.0   | 1.4E-03 |
| NKD1     | -1.1 | 9.4E-01 | 2.3   | 4.3E-03 |
| NKG7     | -1.0 | 9.9E-01 | 2.3   | 1.6E-03 |
| NLRP6    | 1.1  | 9.3E-01 | 2.9   | 1.5E-03 |
| NOCT     | -1.2 | 8.6E-01 | 2.2   | 7.0E-05 |
| NR1H2    | 1.1  | 9.4E-01 | 2.3   | 4.4E-06 |
| NRM      | 1.1  | 9.8E-01 | 3.5   | 4.6E-09 |
| NRSN1    | 1.7  | 5.4E-01 | 175.6 | 2.4E-39 |
| NUDT13   | -1.4 | 3.6E-01 | 2.0   | 3.1E-04 |
| NUTM2D   | -1.2 | 9.0E-01 | 2.1   | 6.1E-04 |
| ODF3B    | -1.3 | 7.6E-01 | 2.3   | 1.8E-02 |
| OMG      | 1.1  | 9.5E-01 | 3.1   | 4.0E-05 |
| OR2B11   | -1.0 | 9.9E-01 | 2.4   | 1.4E-04 |
| OR2V1    | 1.2  | 8.1E-01 | 2.1   | 2.7E-02 |
| OR7A5    | -1.1 | 9.7E-01 | 2.8   | 1.3E-06 |
| OS9      | 1.3  | 5.4E-01 | 2.2   | 5.8E-03 |
| PAPLN    | 1.0  | 9.9E-01 | 2.2   | 1.9E-03 |
| PARP3    | 1.1  | 9.6E-01 | 2.2   | 6.0E-04 |
| PCDH12   | -1.5 | 2.3E-01 | 2.7   | 2.9E-05 |
| PDLIM1   | -1.2 | 6.2E-01 | -2.1  | 2.2E-02 |
| PDZD2    | -1.1 | 9.6E-01 | 2.7   | 5.0E-08 |
| PFDN1    | -1.0 | 1.0E+00 | 2.1   | 4.0E-03 |
| PFN2     | -1.1 | 9.4E-01 | 2.5   | 6.2E-06 |
| PGGHG    | 1.3  | 5.0E-01 | 2.0   | 1.1E-02 |
| PGLYRP1  | 1.9  | 1.8E-01 | 3.3   | 5.9E-04 |
| PHACTR3  | -1.1 | 9.5E-01 | 2.0   | 7.7E-04 |
| PHOSPHO1 | 1.3  | 4.2E-01 | 2.2   | 5.4E-03 |
| PIGC     | 1.9  | 3.8E-07 | 2.0   | 9.0E-04 |
| PIM2     | -1.2 | 6.2E-01 | 2.0   | 1.3E-02 |
| PKD1L3   | -1.2 | 8.6E-01 | 2.1   | 1.2E-02 |
| PKM      | 1.1  | 8.7E-01 | 2.2   | 2.4E-04 |

|             |      |         |      |         |
|-------------|------|---------|------|---------|
| PLA2G7      | -1.2 | 8.0E-01 | -2.0 | 1.5E-03 |
| PLCE1       | -1.1 | 9.4E-01 | 2.1  | 1.5E-05 |
| PLD5        | 1.1  | 9.7E-01 | 2.5  | 1.6E-03 |
| PLEKHG6     | 1.2  | 8.4E-01 | 4.5  | 6.6E-11 |
| PLEKHO2     | 1.1  | 9.5E-01 | 2.3  | 1.5E-02 |
| PLLP        | 1.4  | 7.6E-01 | 19.0 | 4.8E-13 |
| PLN         | -1.1 | 9.2E-01 | 2.2  | 7.0E-05 |
| PLSCR3      | -1.0 | 1.0E+00 | 2.2  | 2.2E-04 |
| PODXL       | -1.3 | 5.6E-01 | 4.0  | 1.1E-13 |
| POLR2E      | 1.1  | 8.4E-01 | 2.0  | 5.8E-05 |
| POTEC       | -1.1 | 9.4E-01 | 2.2  | 1.1E-03 |
| POTEM       | -1.2 | 7.7E-01 | 2.2  | 8.7E-06 |
| PPAN-P2RY11 | 1.4  | 6.2E-01 | 2.0  | 1.1E-02 |
| PPEF2       | 1.3  | 9.1E-01 | 60.2 | 2.1E-18 |
| PPIAL4H     | -1.2 | 8.9E-01 | -2.1 | 8.7E-03 |
| PPP1R15A    | 1.3  | 5.8E-01 | 2.0  | 1.8E-02 |
| PPP2R3A     | -1.0 | 9.9E-01 | 3.1  | 7.7E-14 |
| PPP5D1      | -1.1 | 9.8E-01 | 2.6  | 4.2E-05 |
| PRR13       | 1.1  | 8.8E-01 | 2.3  | 1.2E-03 |
| PRSS53      | 1.0  | 9.9E-01 | 2.0  | 2.3E-02 |
| PRUNE2      | 1.5  | 3.4E-01 | 5.1  | 1.5E-13 |
| PTPN6       | 1.2  | 7.6E-01 | 2.4  | 2.6E-03 |
| PTPRZ1      | -1.3 | 5.7E-01 | 2.0  | 3.9E-02 |
| RAB15       | -1.0 | 9.9E-01 | 2.8  | 5.0E-07 |
| RAB36       | 1.1  | 9.4E-01 | 2.0  | 1.4E-02 |
| RAB43       | 1.0  | 9.8E-01 | 2.1  | 1.9E-02 |
| RAD23A      | 1.2  | 6.1E-01 | 2.6  | 1.9E-04 |
| RAD9B       | -1.0 | 9.9E-01 | 2.4  | 4.6E-05 |
| RAP1GAP     | -1.9 | 9.4E-02 | 3.3  | 4.7E-04 |
| RAVER2      | -1.0 | 9.9E-01 | 2.0  | 5.7E-05 |
| RBP5        | -1.0 | 9.9E-01 | 2.4  | 6.1E-04 |
| RGPD1       | 1.0  | 9.9E-01 | 2.2  | 5.5E-03 |
| RGS9        | 1.0  | 9.9E-01 | 2.9  | 2.9E-05 |
| RHBDF2      | -1.1 | 9.6E-01 | 2.1  | 3.7E-02 |
| RHD         | -1.2 | 5.7E-01 | 2.7  | 2.7E-09 |
| RIPOR3      | -1.3 | 7.3E-01 | 2.9  | 4.3E-09 |
| RNF167      | 1.1  | 8.8E-01 | 2.1  | 1.1E-03 |
| RNF175      | -1.1 | 9.4E-01 | 8.2  | 3.9E-13 |
| RNF187      | 1.2  | 7.4E-01 | 2.1  | 6.1E-05 |
| RP1         | 1.6  | 1.9E-01 | 5.7  | 2.3E-09 |
| RPLP1       | 1.1  | 9.7E-01 | -2.1 | 1.5E-03 |
| RPUSD1      | -1.0 | 9.9E-01 | 2.0  | 1.3E-03 |
| RSPH9       | -1.4 | 4.0E-01 | 2.6  | 7.4E-03 |

|                |      |         |      |         |
|----------------|------|---------|------|---------|
| RTEL1-TNFRSF6B | 1.3  | 8.0E-01 | 2.5  | 1.9E-05 |
| RUNDC3B        | 1.2  | 8.5E-01 | 2.3  | 8.2E-04 |
| RUSC1          | -1.2 | 8.7E-01 | 2.0  | 4.7E-03 |
| S100A6         | 1.5  | 2.4E-01 | 2.3  | 4.0E-03 |
| S100Z          | -1.1 | 9.7E-01 | -2.1 | 2.3E-04 |
| SAXO2          | -1.0 | 9.9E-01 | 3.2  | 1.2E-09 |
| SCAF1          | 1.3  | 7.6E-01 | 2.0  | 4.2E-02 |
| SCG3           | -1.1 | 9.0E-01 | 4.0  | 7.8E-12 |
| SCN2A          | -1.1 | 9.2E-01 | 6.5  | 3.5E-16 |
| SCNM1          | 1.3  | 3.6E-01 | 2.3  | 1.2E-05 |
| SELENOP        | 1.1  | 9.3E-01 | 2.6  | 2.9E-05 |
| SEMA5B         | 1.1  | 9.8E-01 | 2.4  | 4.5E-04 |
| SEPTIN4        | -1.0 | 9.9E-01 | 2.4  | 3.5E-02 |
| SERPINB2       | -1.1 | 9.4E-01 | -2.1 | 2.3E-02 |
| SGK1           | 1.1  | 9.4E-01 | -2.0 | 4.4E-03 |
| SGTA           | 1.1  | 9.4E-01 | 2.2  | 6.9E-04 |
| SIGLEC14       | -1.1 | 9.4E-01 | 4.8  | 9.3E-05 |
| SLC14A2        | -1.0 | 9.9E-01 | 2.7  | 2.6E-06 |
| SLC22A23       | 1.1  | 9.4E-01 | 3.0  | 1.2E-11 |
| SLC24A1        | -1.1 | 9.2E-01 | 2.6  | 3.2E-09 |
| SLC28A2        | 1.1  | 9.0E-01 | 2.3  | 1.1E-03 |
| SLC35G5        | -1.1 | 9.4E-01 | 2.0  | 6.5E-03 |
| SLC48A1        | 1.1  | 8.5E-01 | 2.0  | 1.1E-03 |
| SLC4A10        | -1.4 | 1.3E-01 | -2.2 | 3.7E-04 |
| SLC6A17        | -1.1 | 9.4E-01 | 2.1  | 2.1E-02 |
| SLIT1          | -1.0 | 9.9E-01 | 2.1  | 3.8E-03 |
| SLPI           | 1.8  | 1.9E-02 | 2.9  | 1.4E-02 |
| SNRNP70        | 1.3  | 4.5E-01 | 2.1  | 8.5E-04 |
| SPATA1         | -1.1 | 9.6E-01 | 4.9  | 3.2E-12 |
| SPEG           | 1.1  | 9.4E-01 | 2.0  | 8.1E-03 |
| SPI1           | 1.1  | 8.8E-01 | 2.5  | 5.0E-03 |
| SPRYD3         | 1.1  | 8.9E-01 | 2.2  | 2.7E-05 |
| SPTBN5         | 1.3  | 6.6E-01 | 2.1  | 1.4E-03 |
| SPTSSB         | -1.9 | 2.2E-02 | -2.0 | 4.9E-02 |
| SRRM4          | -1.1 | 9.1E-01 | 2.1  | 2.8E-03 |
| SRSF12         | -1.1 | 9.7E-01 | 2.5  | 6.3E-05 |
| SSBP4          | 1.3  | 6.8E-01 | 2.0  | 4.6E-03 |
| ST13           | 1.3  | 1.7E-01 | 2.0  | 1.6E-04 |
| ST6GALNAC4     | 1.1  | 9.4E-01 | 2.0  | 2.2E-02 |
| STARD5         | -1.2 | 8.8E-01 | 7.7  | 5.2E-28 |
| SULF2          | 1.3  | 2.4E-01 | -2.0 | 1.5E-03 |
| SYCP3          | -1.1 | 9.7E-01 | 3.1  | 7.8E-09 |

|          |      |         |      |         |
|----------|------|---------|------|---------|
| SYN3     | 1.1  | 9.4E-01 | 2.4  | 1.5E-04 |
| TAF1C    | 1.1  | 9.4E-01 | 2.0  | 9.3E-04 |
| TAF9B    | -1.1 | 9.6E-01 | 2.2  | 7.0E-07 |
| TAOK1    | 1.2  | 7.8E-01 | -2.2 | 1.3E-02 |
| TBCE     | -1.1 | 9.4E-01 | 11.9 | 1.7E-08 |
| TCEA2    | 1.3  | 7.6E-01 | 2.3  | 4.1E-04 |
| TECRL    | -1.0 | 9.8E-01 | 3.2  | 2.1E-07 |
| TIGD3    | 1.2  | 8.5E-01 | 2.3  | 6.5E-04 |
| TLR9     | 1.5  | 4.9E-01 | 2.5  | 1.2E-03 |
| TMCC2    | 1.5  | 1.7E-01 | 2.4  | 1.9E-02 |
| TMEM132A | 1.3  | 7.1E-01 | 4.9  | 1.3E-12 |
| TMEM150A | -1.0 | 1.0E+00 | 2.0  | 8.7E-04 |
| TMEM176B | 1.0  | 1.0E+00 | 3.3  | 1.3E-10 |
| TMEM266  | 1.1  | 9.5E-01 | 2.0  | 3.6E-03 |
| TMEM86B  | 1.4  | 3.6E-01 | 2.0  | 8.6E-03 |
| TMPRSS9  | 1.1  | 9.4E-01 | 2.7  | 4.0E-04 |
| TNNI2    | 1.5  | 4.7E-01 | 2.2  | 1.2E-02 |
| TOR2A    | -1.1 | 9.5E-01 | 2.2  | 2.5E-05 |
| TPPP     | 1.2  | 9.4E-01 | 2.1  | 2.9E-02 |
| TRAV1-2  | -1.1 | 9.5E-01 | -2.4 | 8.0E-03 |
| TRAV8-6  | -1.1 | 9.5E-01 | -2.0 | 3.0E-02 |
| TRGV2    | -1.4 | 3.8E-01 | 2.2  | 8.0E-04 |
| TRGV3    | -1.4 | 4.0E-01 | 2.0  | 4.4E-03 |
| TRIM26   | -1.1 | 9.0E-01 | 2.0  | 1.3E-02 |
| TRIR     | 1.5  | 2.4E-01 | 2.3  | 1.4E-05 |
| TSC22D3  | 1.1  | 9.7E-01 | 2.6  | 1.1E-03 |
| TSC22D4  | 1.2  | 6.6E-01 | 2.5  | 1.6E-03 |
| TSPO2    | 1.4  | 5.2E-01 | 2.3  | 1.6E-03 |
| TVP23A   | 1.0  | 9.9E-01 | 2.5  | 3.3E-06 |
| UBALD2   | 1.4  | 9.8E-03 | 2.3  | 1.2E-03 |
| UBE2O    | 1.5  | 1.3E-02 | 2.0  | 1.6E-02 |
| USP35    | 1.0  | 9.9E-01 | 2.6  | 1.4E-04 |
| VASH2    | -1.0 | 9.9E-01 | 3.6  | 1.4E-11 |
| VAT1     | -1.0 | 9.9E-01 | 2.7  | 1.8E-04 |
| VEGFB    | -1.0 | 1.0E+00 | 2.2  | 2.3E-03 |
| VSIG4    | -1.1 | 9.8E-01 | 5.6  | 3.7E-17 |
| WBP2     | 1.1  | 8.7E-01 | 2.0  | 3.2E-02 |
| WNK3     | 1.1  | 9.4E-01 | 2.0  | 7.1E-03 |
| WNT16    | -1.0 | 9.9E-01 | 2.1  | 9.0E-03 |
| XRCC3    | -1.1 | 9.8E-01 | 3.2  | 3.2E-10 |
| XRRA1    | -1.5 | 6.8E-02 | 2.1  | 1.1E-04 |
| YIPF3    | 1.1  | 8.3E-01 | 2.2  | 5.7E-05 |
| ZNF219   | 1.2  | 9.1E-01 | 3.4  | 3.1E-08 |

Online supplement to: The Rheumatoid Arthritis Gene Expression Signature Among Women Who Improve or Worsen During Pregnancy: A Pilot Study. *The Journal of Rheumatology*. doi:10.3899/jrheum.201128

|         |      |         |     |         |
|---------|------|---------|-----|---------|
| ZNF608  | 1.3  | 8.0E-01 | 2.0 | 6.6E-04 |
| ZSCAN31 | -1.1 | 9.7E-01 | 2.1 | 6.1E-03 |
